# Supplementary material
Source: MDPI journal article supplement (https://www.mdpi.com/1999-4907/12/11/1565)
Supplement: s1 [file s1]

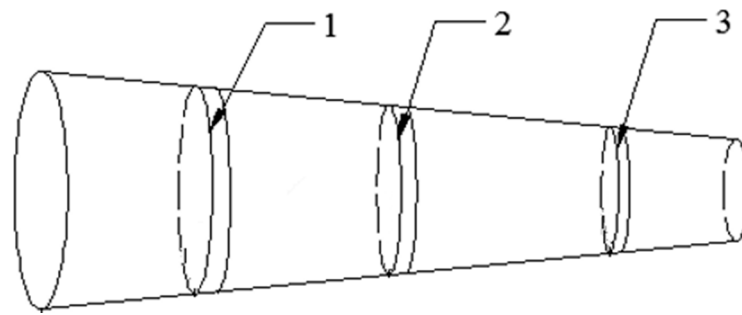

Figure S1. Sampling diagram of trunk parts of *E. grandis*. 1) represented the DBH, which is 1.4 m from the ground; 2) represented the middle part of the trunk, about 10.5 m from the ground. 3) represented the upper part of the trunk, which is about 21.0 m from the ground.

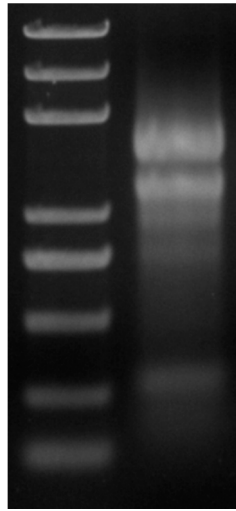

Figure S2. Total RNA extraction from *E. grandis* immature xylem  
M2Kb, molecular marker2000 bp

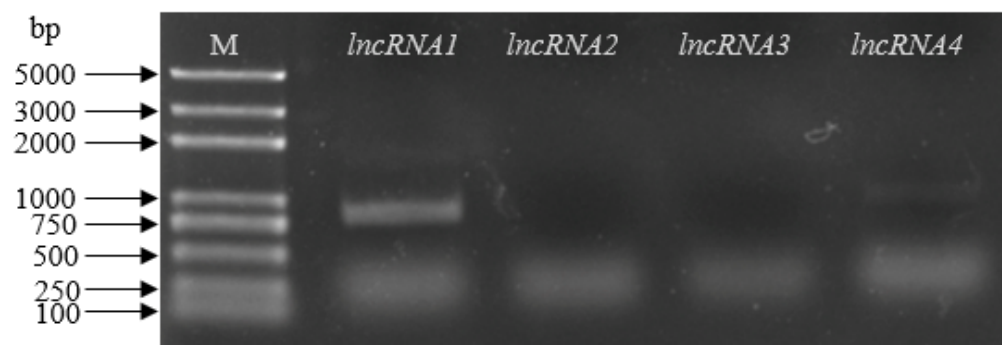

Figure S3. Electrophoresis for PCR product of *lncRNA1* and *lncRNA4* cloning

Table S1. Primer sequence of target gene qPCR

| Gene           |   | Primer 5'-3'             |
|----------------|---|--------------------------|
| XM_010040005.2 | F | TCCGATGCCCAAGTTTCTCC     |
|                | R | ATCCCAACCCGAATACCCAG     |
| NM_001302719.1 | F | AGAATGAACTCGGACAAAAGCC   |
|                | R | AATGGGGAACGCACACTCA      |
| XM_010058963.2 | F | GGCACCGAGTCCGAAATAGA     |
|                | R | AACATCCAAGCCACAGCGAA     |
| XM_010048758.2 | F | AACAGAACAAGCACAAAGCACC   |
|                | R | TGACCATAAGATGAGACTGGGAAC |
| XM_010046732.2 | F | GTTGCTTCGGTGGTCATTGG     |
|                | R | TGTTTCGTTGGGGTTGGGAC     |
| XM_010030508.2 | F | GGGTATGGCTCTTTGGCTGT     |
|                | R | GTCTGTGTTGTTGTTGCGGT     |
| XR_001980078.1 | F | TAGACACACGCTATGCTGCC     |
|                | R | ACACTCGGTGCGACAAATGA     |
| XR_001985124.1 | F | ACAACTCAAATCCCAATCCACC   |
|                | R | CCTTCTTCAGCACTCCTCACT    |
| XR_727233.2    | F | TGAATGAAAGGAGCAGCCAGA    |
|                | R | CGGCAAGGTGAAAGCAGTT      |
| XR_720796.2    | F | CTGCCCCCTCCTATGTTGTC     |
|                | R | GGCTCTCTTCCCATCCTGTATC   |
| TCONS_00028436 | F | CCAGTCCTCGCCCTGTTCT      |
|                | R | TGCTTCTCTTTGTCTGGGTTCA   |
| TCONS_00034287 | F | GCTTCTGTAGTTTCGTCTCGTC   |
|                | R | GCCCTTTTCTCAGCACATTC     |
| TCONS_00074394 | F | CGAGCCAAACAAGCACACAA     |
|                | R | ACCCATCGTCGGATTTCTTC     |
| TCONS_00003650 | F | AGCGAGATTGGGAAGAACGG     |
|                | R | TCAAAGGACAAGGTGGACAGA    |
| TCONS_00003171 | F | GTTTATTCCCTTATGCTGGCTTG  |
|                | R | CCACGGTCTCCTAACCCTTG     |

Table S2. Primer sequence

| Gene                   | Primer 5'-3'                                         |
|------------------------|------------------------------------------------------|
| EglnR1(XR_001980078.1) | F <u>ACGGGGGACTCTTGACCATGGGTTTGACTTGATAACGCTGTG</u>  |
|                        | R <u>CTGGTCACCAATTCACACGTGAAAACGATAAAAGTCGTGTGGA</u> |
| EglnR2(XR_720796.2)    | F <u>ACGGGGGACTCTTGACCATGGACCCGACGGAGCGCCTGGCCC</u>  |
|                        | R <u>CTGGTCACCAATTCACACGTGCAAGCCAACGTACTTACGCTT</u>  |
| EglnR3(XR_727233.2)    | F <u>ACGGGGGACTCTTGACCATGGCGACGAAGAAGAAAACGGAG</u>   |
|                        | R <u>CTGGTCACCAATTCACACGTGTGCAGATTATAATACAATACA</u>  |
| EglnR4(XR_001985124.1) | F <u>ACGGGGGACTCTTGACCATGGCCATGCCGAAAAACAGGTGAA</u>  |
|                        | R <u>CTGGTCACCAATTCACACGTGTATTATTACTTAAAATATTGG</u>  |

The underlined part represents the gene sequence, and the underlined part is the connector sequence used for cloning.

Table S3. Primer sequences of positive control test

| Name                                     | Primer 5'-3'                               |
|------------------------------------------|--------------------------------------------|
| Carrier identification primer<br>NPTII-F | ATGGGGATTGAACAAGATGGAT                     |
| Carrier identification primer<br>NPTII-R | AGAACTCGTCAAGAAGGCG                        |
| lncRNA1 Specific primers<br>GSP-F        | ACGGGGGACTCTTGACCATGGGTTTGACTTGATAACGCTGTG |
| lncRNA1 Specific primers<br>GSP--R       | CTGGTCACCAATTCACACGTGAAAACGATAAAGTCGTGTGGA |
| lncRNA4 Specific primers<br>GSP-F        | ACGGGGGACTCTTGACCATGGCCATGCCGAAAAACAGGTGAA |
| lncRNA4 Specific primers<br>GSP--R       | CTGGTCACCAATTCACACGTGTATTATTACTTAAAATATTGG |

Table S4. Genome comparative statistics

| Sample     | Total reads | Unmapped reads       | Unique mapped reads  | Multiple Mapped reads | Mapping ratio |
|------------|-------------|----------------------|----------------------|-----------------------|---------------|
| lnc-Eg-1-1 | 70483482    | 24333767<br>(34.52%) | 45549467<br>(64.62%) | 600248 (0.85%)        | 65.48%        |
| lnc-Eg-1-2 | 74001308    | 24243744<br>(32.76%) | 49139752<br>(66.40%) | 617812 (0.83%)        | 67.24%        |
| lnc-Eg-1-3 | 92610992    | 27699495<br>(29.91%) | 64135663<br>(69.25%) | 775834 (0.84%)        | 70.09%        |
| lnc-Eg-2-1 | 71071034    | 25913896<br>(36.46%) | 44588760<br>(62.74%) | 568378 (0.80%)        | 63.54%        |
| lnc-Eg-2-2 | 80106116    | 27588617<br>(34.44%) | 51861927<br>(64.74%) | 655572 (0.82%)        | 65.56%        |
| lnc-Eg-2-3 | 81976276    | 28491700<br>(34.76%) | 52862820<br>(64.49%) | 621756 (0.76%)        | 65.24%        |
| lnc-Eg-3-1 | 66293004    | 20222163<br>(30.50%) | 45530175<br>(68.68%) | 540666 (0.82%)        | 69.50%        |
| lnc-Eg-3-2 | 83054758    | 30310117<br>(36.49%) | 52093301<br>(62.72%) | 651340 (0.78%)        | 63.51%        |
| lnc-Eg-3-3 | 76564332    | 26099385<br>(34.09%) | 49865059<br>(65.13%) | 599888 (0.78%)        | 65.91%        |

Table S5. Statistics on the number of transcripts

| Sample name | Known transcripts | New transcripts | Total transcripts |
|-------------|-------------------|-----------------|-------------------|
| Eg-1        | 3111 (42.24%)     | 3034            | 6145              |
| Eg-2        | 3145 (42.70%)     | 3085            | 6230              |
| Eg-3        | 3184 (43.23%)     | 3198            | 6382              |



Table S6. Filtering statistics of each sample data

| sample     | clear reads     | clear tags          |
|------------|-----------------|---------------------|
| mir-Eg-1-1 | 19195506 (100%) | 17188379 (93.5914%) |
| mir-Eg-1-2 | 11284354 (100%) | 9717184 (90.0907%)  |
| mir-Eg-1-3 | 14029273 (100%) | 12424446 (92.5181%) |
| mir-Eg-2-1 | 15835441 (100%) | 14023205 (91.6934%) |
| mir-Eg-2-2 | 14707836 (100%) | 12913710 (91.1709%) |
| mir-Eg-2-3 | 15196301 (100%) | 13856645 (94.6872%) |
| mir-Eg-3-1 | 13768037 (100%) | 12451928 (94.0469%) |
| mir-Eg-3-2 | 13297013 (100%) | 12222468 (95.1670%) |
| mir-Eg-3-3 | 12778590 (100%) | 11772059 (95.7422%) |

Table S7. The tag statistics of samples, compared with the genome

| sample     | total    | match    | ratio(%) |
|------------|----------|----------|----------|
| mir-Eg-1-1 | 17188379 | 10198736 | 59.34    |
| mir-Eg-1-2 | 9717184  | 5409417  | 55.67    |
| mir-Eg-1-3 | 12424446 | 6539559  | 52.63    |
| mir-Eg-2-1 | 14023205 | 8422141  | 60.06    |
| mir-Eg-2-2 | 12913710 | 8701828  | 67.38    |
| mir-Eg-2-3 | 13856645 | 7150397  | 51.60    |
| mir-Eg-3-1 | 12451928 | 7195374  | 57.79    |
| mir-Eg-3-2 | 12222468 | 6598773  | 53.99    |
| mir-Eg-3-3 | 11772059 | 5787837  | 49.17    |

Table S8. Statistics of known miRNA number and tag abundance identified in each sample

| sample     | total    | miRNA num | tags uniq | tags total | ratio(%) |
|------------|----------|-----------|-----------|------------|----------|
| mir-Eg-1-1 | 17188379 | 306       | 12337     | 1855844    | 10.80%   |
| mir-Eg-1-2 | 9717184  | 228       | 7293      | 925292     | 9.52%    |
| mir-Eg-1-3 | 12424446 | 249       | 7837      | 821287     | 6.61%    |
| mir-Eg-2-1 | 14023205 | 272       | 9970      | 1139684    | 8.13%    |
| mir-Eg-2-2 | 12913710 | 172       | 7254      | 1846069    | 14.30%   |
| mir-Eg-2-3 | 13856645 | 233       | 7596      | 884420     | 6.38%    |
| mir-Eg-3-1 | 12451928 | 283       | 10326     | 979617     | 7.87%    |
| mir-Eg-3-2 | 12222468 | 206       | 7232      | 916688     | 7.50%    |
| mir-Eg-3-3 | 11772059 | 190       | 6490      | 863884     | 7.34%    |

Table S9. The number of novel miRNA identified in each sample and the abundance statistics of tag

| sample     | total    | miRNA number | tags uniq | tags total | Ratio (%) |
|------------|----------|--------------|-----------|------------|-----------|
| mir-Eg-1-1 | 17188379 | 3508         | 3857      | 137817     | 0.80%     |
| mir-Eg-1-2 | 9717184  | 3020         | 3175      | 55776      | 0.57%     |
| mir-Eg-1-3 | 12424446 | 3376         | 3621      | 50850      | 0.41%     |
| mir-Eg-2-1 | 14023205 | 3329         | 3604      | 103383     | 0.74%     |
| mir-Eg-2-2 | 12913710 | 1644         | 1783      | 104857     | 0.81%     |
| mir-Eg-2-3 | 13856645 | 3466         | 3715      | 51609      | 0.37%     |
| mir-Eg-3-1 | 12451928 | 3288         | 3564      | 103357     | 0.83%     |
| mir-Eg-3-2 | 12222468 | 3365         | 3634      | 60721      | 0.50%     |
| mir-Eg-3-3 | 11772059 | 3197         | 3397      | 43359      | 0.37%     |

Table S10. Predictive statistics of all miRNA target gene loci

| Sample_name | miRNA_number | target_gene_number | target_site_number |
|-------------|--------------|--------------------|--------------------|
| mir-Eg-1-1  | 1125         | 4677               | 7681               |
| mir-Eg-1-2  | 933          | 3856               | 6770               |
| mir-Eg-1-3  | 981          | 3811               | 6074               |
| mir-Eg-2-1  | 1065         | 4398               | 6934               |
| mir-Eg-2-2  | 603          | 2424               | 3936               |
| mir-Eg-2-3  | 982          | 3422               | 5648               |
| mir-Eg-3-1  | 1025         | 3872               | 6208               |
| mir-Eg-3-2  | 976          | 3729               | 6480               |
| mir-Eg-3-3  | 886          | 3146               | 5305               |

Table S11. Statistics on new predictive targeting relationships of circRNAs

| 小 RNA 数目 | 靶基因数目 (环状 RNA) | 靶向关系数目 |
|----------|----------------|--------|
| 4347     | 3871           | 250104 |
